# Supplementary material
Source: publisher figshare collection journal article supplement (https://acs.figshare.com/ndownloader/files/4171354)
Supplement: Supplementary file 1 [file 4171354]

## Supporting Information

### Cation-Condensed Microgel-Core Star Polymers as Polycationic Nanocapsules for Molecular Capture and Release in Water

Kaoru Fukae, Takaya Terashima,\* Mitsuo Sawamoto\*

\*Corresponding Author

Polymer Chemistry, Graduate School of Engineering, Kyoto University

Kyotodaigaku-katsura, Nishikyo-ku, Kyoto 615-8510, Japan

Tel: +81-75-383-2600

Fax: +81-75-383-2601

E-mail: terashima@living.polym.kyoto-u.ac.jp, sawamoto@star.polym.kyoto-u.ac.jp

#### Contents:

|                   |                                                                         |   |
|-------------------|-------------------------------------------------------------------------|---|
| <b>Figure S1.</b> | Synthesis of Cation-Condensed Microgel Star Polymers (S1)               | 2 |
| <b>Figure S2.</b> | <sup>1</sup> H NMR spectra                                              | 2 |
| <b>Figure S3.</b> | Synthesis of Microgel Star Polymers with a Non-Ionic Linking Agent (2') | 3 |
| <b>Figure S4.</b> | Conformation Analysis by MO-G with AM-1                                 | 3 |
| <b>Figure S5.</b> | DSC Thermograms                                                         | 4 |
| <b>Table S1.</b>  | DSC analysis                                                            | 4 |
| <b>Table S2.</b>  | Encapsulation of Orange G into Polymers in Water                        | 5 |
| <b>Figure S6.</b> | UV-vis spectra of Methyl Orange in Water                                | 5 |
| <b>Figure S7.</b> | <sup>1</sup> H DOSY spectra                                             | 6 |
| <b>Figure S8.</b> | DLS Measurements                                                        | 6 |
| <b>Table S3.</b>  | Release of Orange G from Polymers with NaCl Aqueous Solution            | 7 |



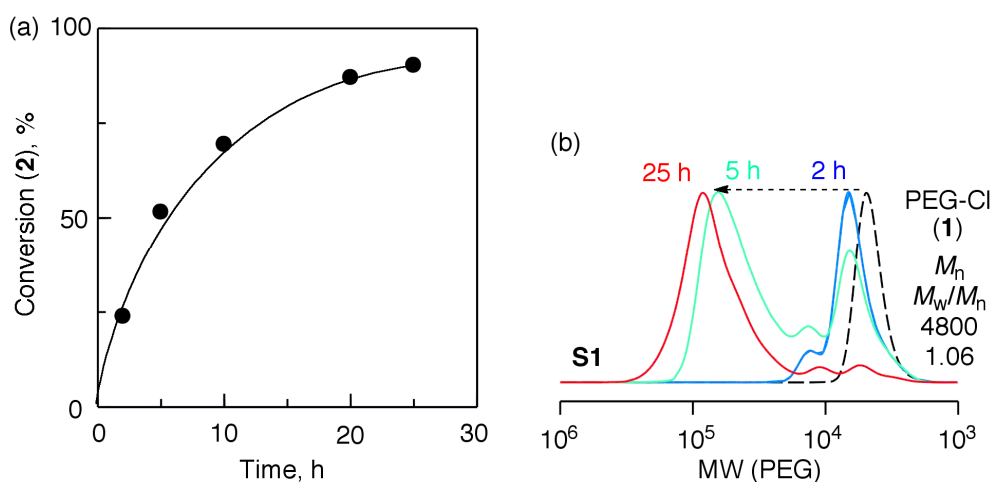

**Figure S1.** (a) Time-conversion curves and (b) SEC curves of the samples obtained from the linking reaction of PEG-Cl (**1**) with **2** and  $\text{RuCp}^*\text{Cl}(\text{PPh}_3)_2$ :  $[\text{1}]/[\text{2}]/[\text{RuCp}^*\text{Cl}(\text{PPh}_3)_2]/[\text{2-DMAE}] = 20/200/2.0/40$  mM in EtOH/DMF (3/1, v/v) at 40 °C.

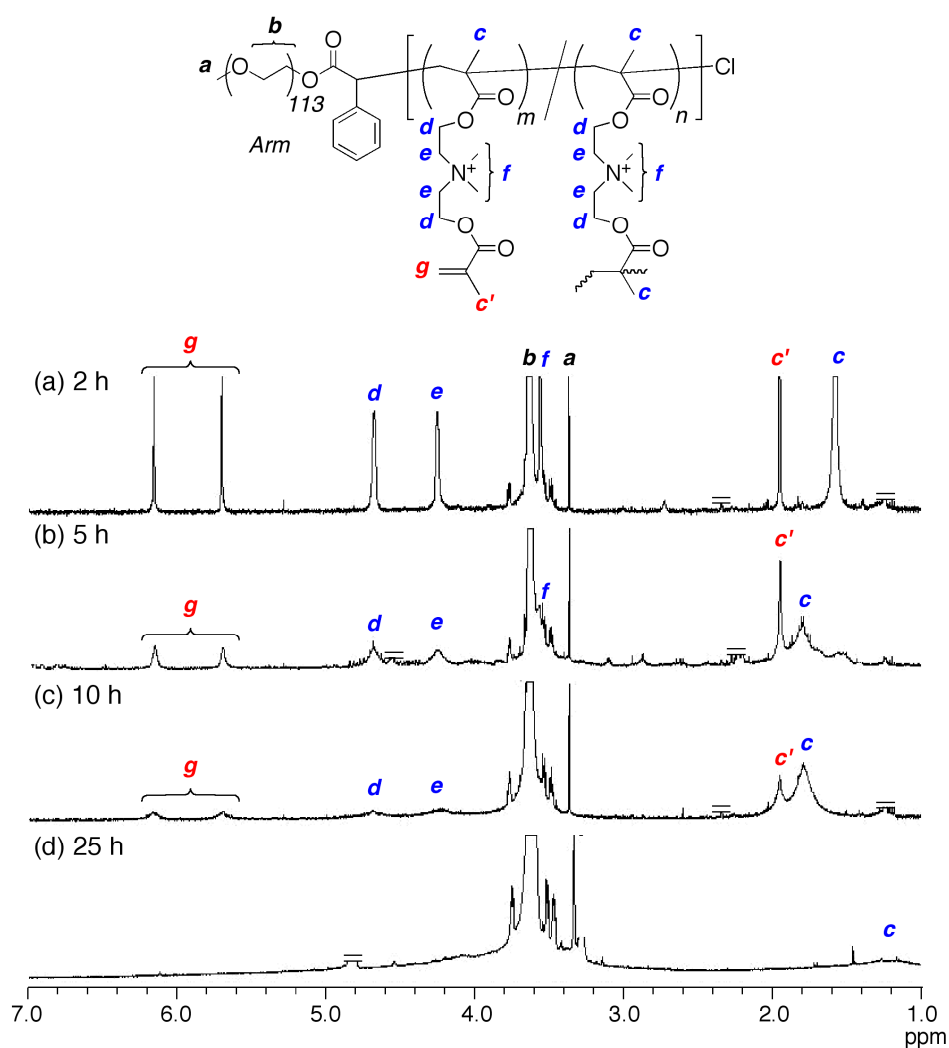

**Figure S2.**  $^1\text{H}$  NMR spectra (500 MHz, in  $\text{CDCl}_3$  at 25 °C) of the samples obtained from the linking reaction of **1** with **2** and  $\text{RuCp}^*\text{Cl}(\text{PPh}_3)_2$ : (a) 2 h; (b) 5 h; (c) 10 h; (d) 25 h.



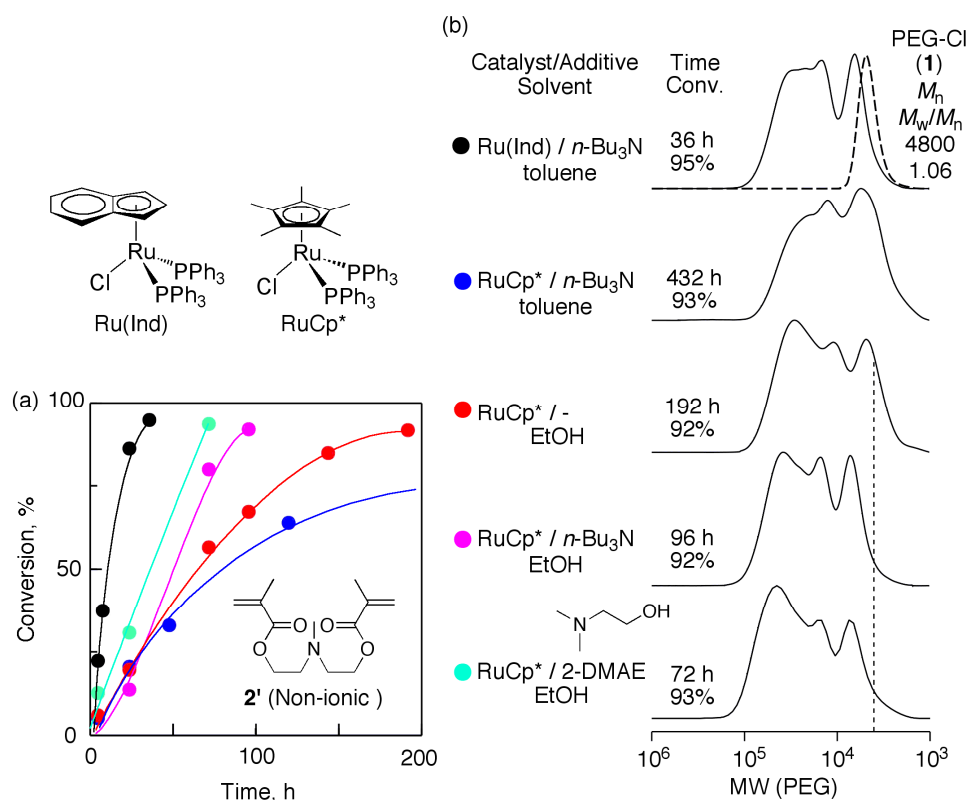

**Figure S3.** (a) Time-conversion curves and (b) SEC curves of the samples obtained from the Ru-mediated linking reaction of **1** with a non-ionic **2'**: [**1**]/[**2'**]/[Ru]/[additive] = 20/200/2/40 mM in toluene at 80 °C or in EtOH at 40 °C.

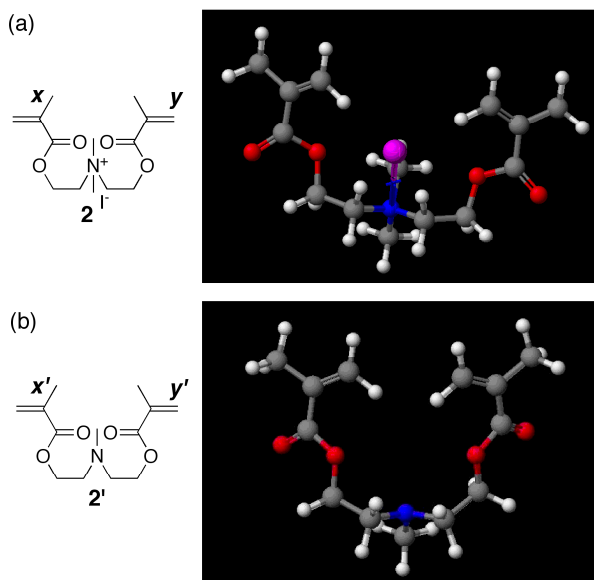

**Figure S4.** Most stable conformations of **2** and **2'**, calculated by MO-G (a semiempirical molecular orbital program) coupled with AM1 (Hamiltonian). The distance between two olefins of **2** (*x*-*y* = ~6.8 Å) was longer than that of **2'** (*x'*-*y'* = ~5.1 Å).



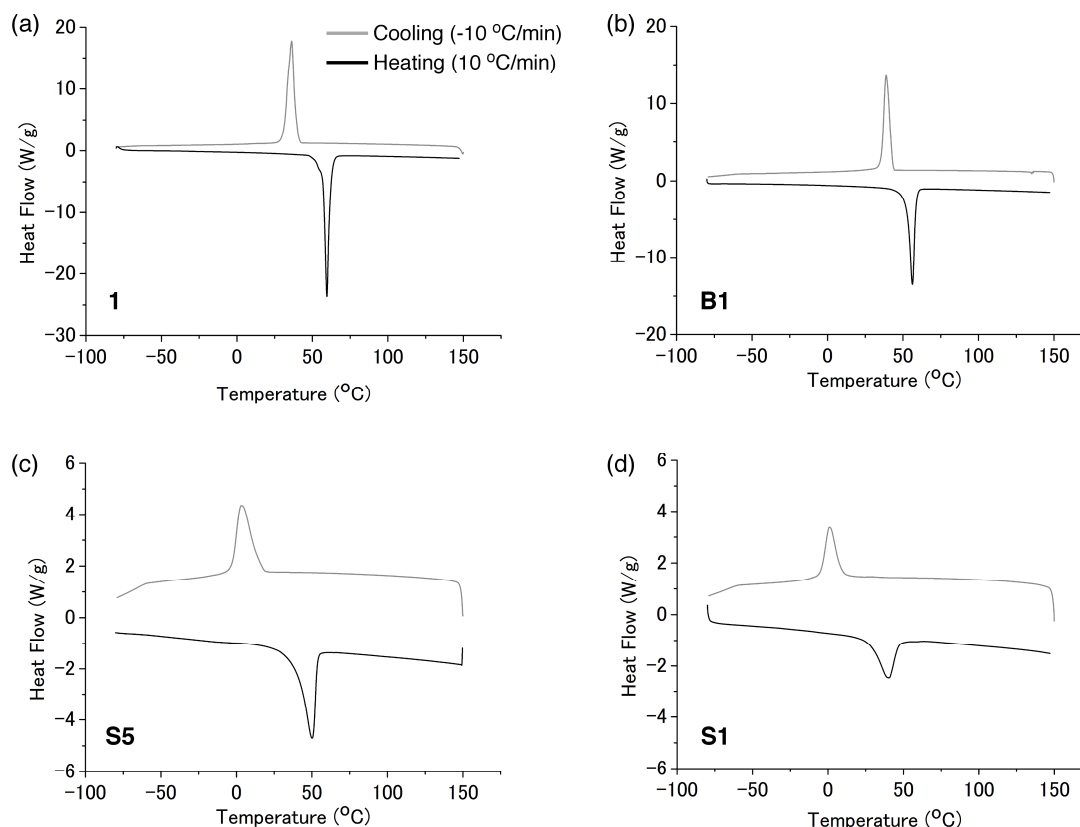

**Figure S5.** DSC thermograms recorded on (a) **1**, (b) **B1**, (c) **S5**, and (d) **S1** via the cooling scan from 150 °C to -80 °C (gray line, cooling rate: -10 °C/min) and the second heating scan from -80 °C to 150 °C (black line, heating rate: 10 °C/min).

**Table S1.** DSC Analysis of Samples (**1**, **B1**, **S5**, **S1**)

| Samples   | $T_c$ (°C) <sup>a</sup> | $T_m$ (°C) <sup>a</sup> | $\Delta H_{m,total}$ (J/g) <sup>b</sup> | $w^c$ | $\Delta H_{m,calcd}^0$ (J/g) <sup>d</sup> | Fractional Crystallinity (%) <sup>e</sup> |
|-----------|-------------------------|-------------------------|-----------------------------------------|-------|-------------------------------------------|-------------------------------------------|
| <b>1</b>  | 36.3                    | 59.6                    | 187                                     | 0.97  | 191                                       | ~100                                      |
| <b>B1</b> | 38.8                    | 56.2                    | 139                                     | 0.65  | 128                                       | ~100                                      |
| <b>S5</b> | 3.2                     | 49.4                    | 69                                      | 0.73  | 144                                       | ~48                                       |
| <b>S1</b> | 1.0                     | 40.3                    | 45                                      | 0.58  | 114                                       | ~40                                       |

<sup>a</sup>  $T_c$  and  $T_m$  were determined by DSC measurements at the second heating step from -80 °C to 150 °C with 10 °C/min, respectively.

<sup>b</sup> Melting enthalpy ( $\Delta H_{m,total}$ ) was obtained from integration of endothermic peaks.

<sup>c</sup> Weight fraction of PEG segments in samples.

<sup>d</sup> Calculated melting enthalpy:  $\Delta H_{m,calcd}^0 = \Delta H_m^0 \times w$ ;  $\Delta H_m^0 = 197$  J/g.

<sup>e</sup> Fractional crystallinity (%) =  $100\Delta H_{m,total}/\Delta H_{m,calcd}^0$ .



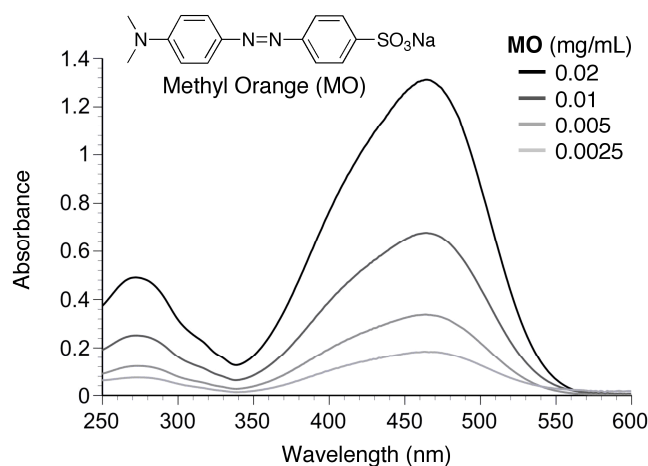

**Figure S6.** UV-vis spectra of MO in H<sub>2</sub>O at r.t.: [MO] = 0.02, 0.01, 0.005, 0.0025 mg/mL ( $6.1 \times 10^{-5}$  -  $7.6 \times 10^{-6}$  M).

**Table S2.** Encapsulation of Orange G into Polymers in Water<sup>a</sup>

| Entry | Polymer   | [OG] <sub>0</sub> /[Polymer] <sub>0</sub><br>(mg/mL) | Time<br>(h) | OG <sub>polymer</sub> <sup>b</sup><br>(μmol/g) | N <sub>OG/polymer</sub> <sup>c</sup> | N <sub>N+/OG</sub> <sup>d</sup> |
|-------|-----------|------------------------------------------------------|-------------|------------------------------------------------|--------------------------------------|---------------------------------|
| 1     | <b>S1</b> | 5/10                                                 | 2           | 652                                            | 402                                  | 1.9                             |
| 2     | <b>S1</b> | 0.5/1                                                | 2           | 672                                            | 414                                  | 1.8                             |
| 3     | <b>S1</b> | 0.5/1                                                | 24          | 721                                            | 445                                  | 1.6                             |
| 4     | <b>S1</b> | 0.05/0.1                                             | 2           | 637                                            | 392                                  | 1.9                             |
| 5     | <b>S1</b> | 0.05/0.1                                             | 10          | 756                                            | 466                                  | 1.5                             |
| 6     | <b>S1</b> | 0.05/0.1                                             | 24          | 780                                            | 482                                  | 1.5                             |
| 7     | <b>B1</b> | 5/10                                                 | 2           | 420                                            | 3.3                                  | 3.3                             |
| 8     | <b>B1</b> | 0.5/1                                                | 2           | 477                                            | 3.8                                  | 2.9                             |
| 9     | <b>B1</b> | 0.5/1                                                | 24          | 475                                            | 3.8                                  | 2.9                             |
| 10    | <b>B1</b> | 0.05/0.1                                             | 2           | 197                                            | 1.6                                  | 9.1                             |
| 11    | <b>B1</b> | 0.05/0.1                                             | 10          | 323                                            | 2.6                                  | 4.5                             |
| 12    | <b>B1</b> | 0.05/0.1                                             | 24          | 475                                            | 3.8                                  | 2.9                             |

<sup>a</sup> Polymers (**S1**, **B1**) and Orange G (OG) were stirred in H<sub>2</sub>O at r.t., followed by the dialysis of the mixture with H<sub>2</sub>O.

<sup>b</sup> The amount of OG per a gram polymer, determined by UV-vis analysis of OG-bearing polymers in H<sub>2</sub>O with the calibration plot of OG at 478 nm.

<sup>c</sup> The number of OG in a single polymer:

$$N_{\text{OG/polymer}} = \text{OG}_{\text{polymer}} \times [M_{\text{w,star}} (\text{MALLS}): \mathbf{S1} \text{ or } M_n (\text{NMR}): \mathbf{B1}] \times 10^{-6}.$$

<sup>d</sup> The number ratio of polymer-bound cations to polycation-bound OGs:

$$N_{\text{N+/OG}} = N_{\text{N+}} / (N_{\text{OG/polymer}} - N_{\text{OG/PEG}}); N_{\text{OG/PEG}} = N_{\text{arm}} \times [N_{\text{OG/polymer}} (\mathbf{S5})/74].$$



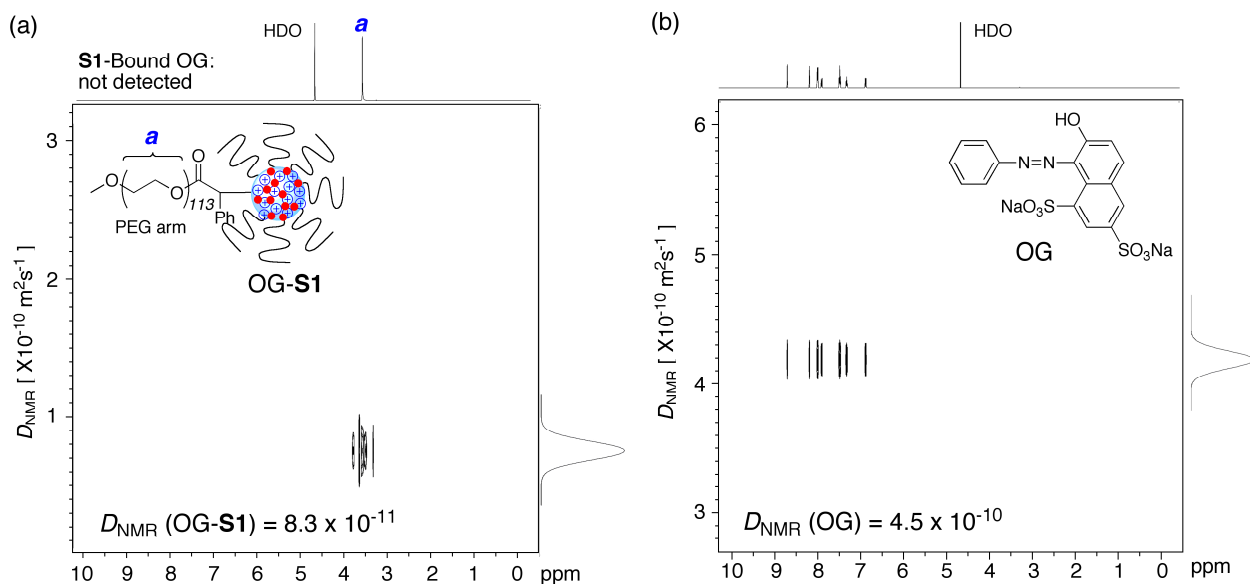

**Figure S7.**  $^1\text{H}$  DOSY spectra (500 MHz) of (a) OG-bearing **S1** and (b) OG alone in  $\text{D}_2\text{O}$  at 30 °C. Diffusion coefficient ( $D_{\text{NMR}}$ ) was calculated by the following software: Delta v4.3.6, JEOL.

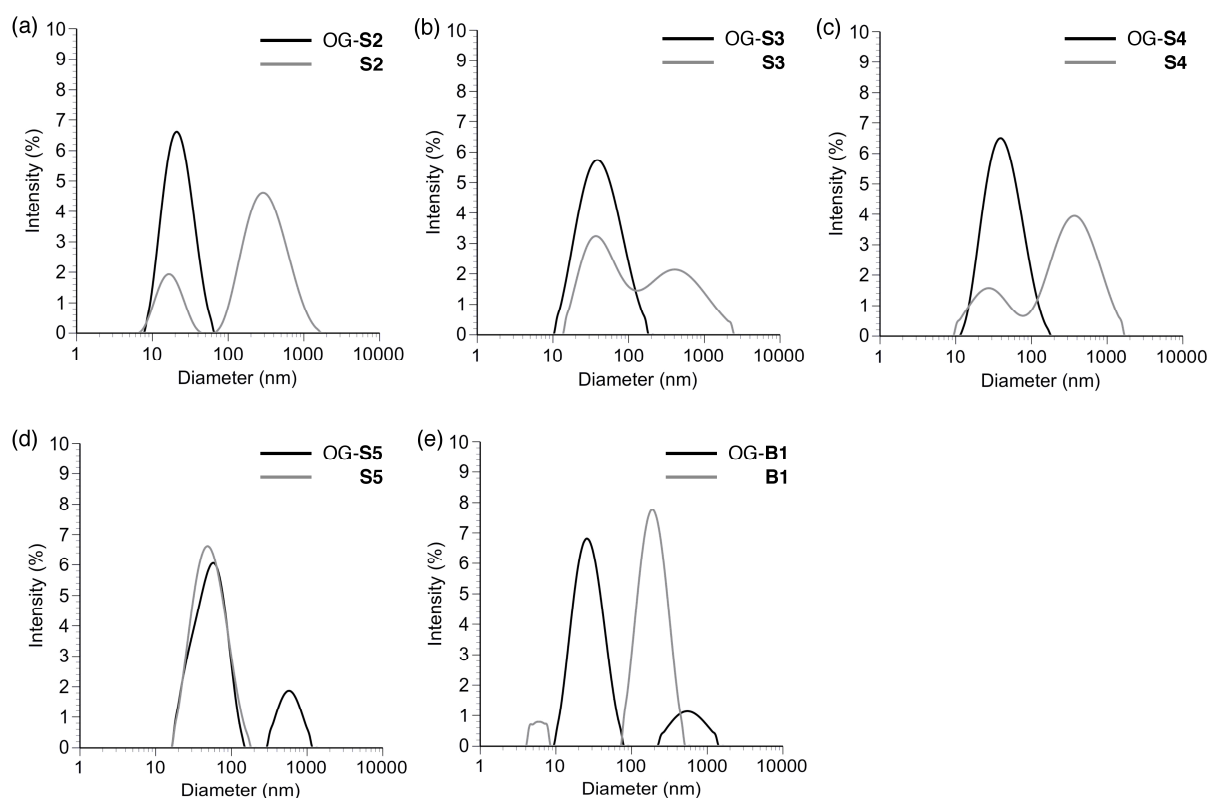

**Figure S8.** DLS intensity distributions of (a) OG-S2 and **S2**, (b) OG-S3 and **S3**, (c) OG-S4 and **S4**, (d) OG-S5 and **S5**, and (e) OG-B1 and **B1** in  $\text{H}_2\text{O}$  at 25 °C: [OG-bearing polymer] (black line) = 1 (**S2-S5**), 10 (**B1**) mg/mL; [polymer] (gray line) = 0.1 mg/mL.



**Table S3.** Release of Polymer-Bound OG from **S1** and **B1** with NaCl aqueous solutions<sup>a</sup>

| Entry | Polymer   | Time (h) | $N_{\text{OG/polymer}}^b$ | OG in Polymer (%) <sup>c</sup> |
|-------|-----------|----------|---------------------------|--------------------------------|
| 1     | <b>S1</b> | 0        | 414                       | 100                            |
| 2     | <b>S1</b> | 2        | 224                       | 54                             |
| 3     | <b>S1</b> | 5        | 107                       | 26                             |
| 4     | <b>S1</b> | 24       | 48                        | 12                             |
| 5     | <b>B1</b> | 0        | 3.8                       | 100                            |
| 6     | <b>B1</b> | 2        | 0.65                      | 17                             |
| 7     | <b>B1</b> | 5        | 0.15                      | 4.0                            |
| 8     | <b>B1</b> | 24       | 0.033                     | 0.88                           |

<sup>a</sup> Aqueous solutions of OG-bearing polymers (**S1**, **B1**) ([polymer] = 1 mg/mL, 1 mL) were charged in dialysis tubes and the tubes were placed in 0.1 M NaCl aqueous solutions (100 mL). At the predetermined periods, the inner solutions were sampled for UV-vis analysis to determine the amount of polymer-bound OGs ( $\text{OG}_{\text{polymer}}$ :  $\mu\text{mol/g}$ ) with the calibration plot of OG at 478 nm.

<sup>b</sup> The number of OG in a single polymer:

$$N_{\text{OG/polymer}} = \text{OG}_{\text{polymer}} \times [M_{\text{w,star}} (\text{MALLS}): \textbf{S1}, M_{\text{n}} (\text{NMR}): \textbf{B1}] \times 10^{-6}.$$

<sup>c</sup> Mole percent of OG remaining in polymers:  $100 \times N_{\text{OG/polymer}}(t)/N_{\text{OG/polymer}}(t = 0)$ .
